# Supplementary material for: Long-Term Use of Benzodiazepines and Nonbenzodiazepine Hypnotics, 1999–2014
Source: Atypon-hosted journal article supplement (doi:10.1176/appi.ps.201700095), 2017-11-01
Supplement: appi.ps.201700095.ds001.pdf [file appi.ps.201700095.ds001.pdf]

**Supplemental Table 1:** Demographic and clinical characteristics of short-, medium- and long-term users and non-users of benzodiazepines, NHANES 1999-2014.

|                       | <b>non-Users</b><br>n=80,475 | <b>Short-term</b><br>n=293 | <b>Medium-term</b><br>n=508 | <b>Long-term</b><br>n=815 |         |
|-----------------------|------------------------------|----------------------------|-----------------------------|---------------------------|---------|
| Characteristic        | n (%)                        | n (%)                      | n (%)                       | n (%)                     | p-value |
| <b>Age, Mean (SD)</b> |                              |                            |                             |                           | <.001   |
| ≤18                   | 36,517 (27.3)                | 13 (1.9)                   | 8 (1.2)                     | 10 (.7)                   |         |
| 19-29                 | 9,416 (15.4)                 | 36 (16.6)                  | 38 (10.0)                   | 15 (3.2)                  |         |
| 30-39                 | 7,267 (13.9)                 | 52 (20.3)                  | 61 (15.0)                   | 54 (7.5)                  |         |
| 40-49                 | 7,067 (14.6)                 | 43 (18.0)                  | 83 (22.0)                   | 117 (17.9)                |         |
| 50-59                 | 5,936 (12.2)                 | 51 (21.5)                  | 92 (20.2)                   | 179 (27.9)                |         |
| 60-69                 | 6,520 (8.3)                  | 47 (12.5)                  | 97 (14.4)                   | 163 (19.9)                |         |
| 70-79                 | 4,504 (5.2)                  | 35 (6.3)                   | 69 (10.4)                   | 147 (13.5)                |         |
| 80+                   | 3,248 (3.0)                  | 16 (3.0)                   | 60 (6.9)                    | 130 (9.6)                 |         |
| <b>Gender</b>         |                              |                            |                             |                           | <.001   |
| Male                  | 39,854 (49.2)                | 95 (29.1)                  | 195 (37.9)                  | 300 (36.8)                |         |
| Female                | 40,621 (50.8)                | 198 (71.0)                 | 313 (62.1)                  | 515 (63.2)                |         |
| <b>Education</b>      |                              |                            |                             |                           | <.001   |
| < High School         | 34,555 (34.6)                | 92 (22.5)                  | 143 (17.4)                  | 254 (22.9)                |         |
| High School Diploma   | 11,000 (19.8)                | 69 (28.0)                  | 140 (29.4)                  | 230 (28.1)                |         |
| Some College          | 12,304 (24.6)                | 84 (31.7)                  | 144 (34.1)                  | 224 (30.7)                |         |
| College or more       | 8,739 (21.0)                 | 41 (17.8)                  | 78 (19.1)                   | 106 (18.4)                |         |
| <b>Race</b>           |                              |                            |                             |                           | <.001   |
| Non-Hispanic White    | 30,120 (65.4)                | 169 (79.2)                 | 340 (83.3)                  | 587 (86.1)                |         |
| Non-Hispanic Black    | 19,210 (12.3)                | 42 (7.6)                   | 63 (5.5)                    | 85 (4.9)                  |         |
| Hispanic              | 25,064 (15.6)                | 70 (11.0)                  | 82 (7.0)                    | 111 (5.8)                 |         |
| Other                 | 6,081 (6.7)                  | 12 (2.2)                   | 23 (4.3)                    | 32 (3.2)                  |         |

**Note:** All percentages are from column totals. *p*-values come from chi-squared tests. All results account for the complex sampling design of the NHANES.

**Supplemental Table 2:** Demographic and clinical characteristics of short-, medium- and long-term users and non-users of non-benzodiazepine hypnotics, NHANES 1999-2014.

|                       | <b>non-Users</b><br>n=81,564 | <b>Short-term</b><br>n=129 | <b>Medium-term</b><br>n=198 | <b>Long-term</b><br>n=200 |         |
|-----------------------|------------------------------|----------------------------|-----------------------------|---------------------------|---------|
| Characteristic        | n (%)                        | n (%)                      | n (%)                       | n (%)                     | p-value |
| <b>Age, Mean (SD)</b> |                              |                            |                             |                           | <.001   |
| ≤18                   | 36,543 (26.8)                | 5 (1.8)                    | 0 (.0)                      | 0 (.0)                    |         |
| 19-29                 | 9,484 (15.3)                 | 10 (11.2)                  | 7 (4.6)                     | 4 (1.6)                   |         |
| 30-39                 | 7,376 (13.9)                 | 18 (16.0)                  | 25 (16.7)                   | 15 (6.3)                  |         |
| 40-49                 | 7,211 (14.6)                 | 21 (23.7)                  | 48 (32.3)                   | 30 (18.7)                 |         |
| 50-59                 | 6,148 (12.4)                 | 23 (20.3)                  | 37 (19.3)                   | 50 (35.5)                 |         |
| 60-69                 | 6,731 (8.5)                  | 30 (16.3)                  | 29 (10.4)                   | 37 (16.4)                 |         |
| 70-79                 | 4,680 (5.4)                  | 12 (7.2)                   | 29 (9.8)                    | 34 (12.8)                 |         |
| 80+                   | 3,391 (3.1)                  | 10 (3.6)                   | 23 (7.0)                    | 30 (8.8)                  |         |
| <b>Gender</b>         |                              |                            |                             |                           | .014    |
| Male                  | 40,256 (49.0)                | 41 (33.8)                  | 78 (44.2)                   | 69 (40.2)                 |         |
| Female                | 41,308 (51.0)                | 88 (66.2)                  | 120 (55.8)                  | 131 (59.8)                |         |
| <b>Education</b>      |                              |                            |                             |                           | <.001   |
| < High School         | 34,917 (34.4)                | 33 (15.9)                  | 44 (13.1)                   | 50 (15.9)                 |         |
| High School Diploma   | 11,324 (20.1)                | 28 (18.1)                  | 46 (22.4)                   | 41 (19.3)                 |         |
| Some College          | 12,596 (24.7)                | 46 (43.7)                  | 62 (33.0)                   | 52 (28.4)                 |         |
| College or more       | 8,840 (20.8)                 | 21 (22.3)                  | 46 (31.5)                   | 57 (36.4)                 |         |
| <b>Race</b>           |                              |                            |                             |                           | <.001   |
| Non-Hispanic White    | 30,867 (65.7)                | 71 (76.8)                  | 128 (83.9)                  | 150 (88.3)                |         |
| Non-Hispanic Black    | 19,333 (12.2)                | 23 (9.4)                   | 29 (5.8)                    | 15 (3.6)                  |         |
| Hispanic              | 25,247 (15.5)                | 27 (8.6)                   | 29 (5.3)                    | 24 (3.9)                  |         |
| Other                 | 6,117 (6.6)                  | 8 (5.2)                    | 12 (5.0)                    | 11 (4.2)                  |         |

**Note:** All percentages are from column totals. *p*-values come from chi-squared tests. All results account for the complex sampling design of the NHANES.
